# Supplementary material
Source: publisher site journal article supplement (https://static.cambridge.org/content/id/urn:cambridge.org:id:article:S1740022820000042/resource/name/S1740022820000042supp001.xlsx)
Supplement: Supplementary file 1 [file S1740022820000042supp001.xlsx]

## Sheet: Coal intensity (Fig. 1)
Year	New Zealand	Uruguay
1890	175.381	39.6518
1891	174.18	38.3909
1892	177.591	32.7665
1893	181.346	nd
1894	191.4	nd
1895	178.212	nd
1896	178.132	35.1372
1897	191.926	25.0883
1898	211.178	36.2201
1899	203.187	47.7012
1900	209.76	39.2192
1901	220.037	39.0194
1902	217.177	nd
1903	228.095	38.0807
1904	243.647	40.9514
1905	248.81	46.1914
1906	249.143	50.4987
1907	254.846	51.2519
1908	nd	63.6791
1909	nd	nd
1910	nd	51.4683
1911	226.422	59.9107
Coal intensity in New Zealand and Uruguay, 1890–1911 (kilos of coal per US$1,000 of GDP, in 2011 US$). Apparent consumption of coal is estimated as domestic production + imports − exports.
Sources: see caption to Figure 1 in Travieso, E. "United by coal, separated by grass: Uruguay and New Zealand during the First Globalization", Journal of Global History 15(2), 2020.

## Sheet: Coal price comparison (Fig. 2)
Year	New Zealand	Uruguay	Denmark	United Kingdom	Australia
1887	11	22.2129	14.7394	5.42361	9.02778
1888	11.0556	25.4328	16.7584	6.56944	8.80556
1889	11.1944	28.7064	18.3554	7.54861	8.72222
1890	11.1944	29.404	18.3554	7.84722	8.38889
1891	11.2222	27.2037	16.7034	7.16667	8.02778
1892	11.1111	25.4328	15.2349	6.72222	7.33333
1893	11.0556	24.1448	14.1336	6.30556	6.80556
1894	10.9722	23.8765	13.583	6.1875	6.38889
1895	10.6389	22.9642	13.3994	5.9375	6.13889
1896	10.2778	22.5273	14.3172	6.04167	5.94444
1897	10	22.5254	15.7856	6.61806	5.91667
1898	10.25	23.9143	18.906	8.25	6.05556
1899	10.5833	25.8726	19.8238	9.25	6.66667
1900	10.8889	26.081	19.4567	9.46528	7.22222
1901	10.8889	24.4699	17.254	8.41667	7.55556
1902	10.8056	22.2337	16.1527	7.70139	7.30556
1903	10.5	21.4143	15.7856	7.27778	6.77778
1904	10.4444	22.0532	15.7856	7.15278	6.41667
1905	10.3889	23.3865	16.8869	7.75	6.41667
1906	10.5069	24.9421	17.9883	8.40278	6.81944
1907	10.6042	24.6921	17.4376	8.65972	7.25
1908	10.7778	25.7199	16.3363	8.38889	7.48611
1909	10.9583	27.6643	15.2349	8.13194	7.51389
1910	10.9792	30.7476	16.5198	8.46528	7.51389
1911	10.9583	31.7754	18.3348	9.11111	7.48611
1912	10.9896	32.0115	19.7929	9.59375	7.5
1913	11.0417	31.4699	20.8633	10.125	7.45833
Coal prices (shillings per ton, three-year moving averages).
Sources: see caption to Figure 2 in Travieso, E. "United by coal, separated by grass: Uruguay and New Zealand during the First Globalization", Journal of Global History 15(2), 2020.

## Sheet: Coal price composition (Fig. 3)
Year	South Wales pithead	Transport to Cardiff	Atlantic freight	Uruguayan tariff	Total price
1887	6.38889	2.55556	10.7167	2.55319	22.2129
1888	8.02778	2.58333	12.2667	2.55319	25.4328
1889	9.5	2.80556	13.8433	2.55319	28.7064
1890	9.75	2.91667	14.18	2.55319	29.404
1891	8.83333	2.69444	13.12	2.55319	27.2037
1892	7.94444	2.66667	12.2667	2.55319	25.4328
1893	7.41667	2.52778	11.6467	2.55319	24.1448
1894	6.91667	2.88889	11.5167	2.55319	23.8765
1895	6.63889	2.69444	11.0767	2.55319	22.9642
1896	6.61111	2.88889	10.4733	2.55319	22.5273
1897	7.55556	2.58333	9.83333	2.55319	22.5254
1898	9.33333	2.77778	9.25	2.55319	23.9143
1899	10.8611	3.25	9.20833	2.55319	25.8726
1900	11.4167	3.52778	8.58333	2.55319	26.081
1901	10.5278	3.63889	7.75	2.55319	24.4699
1902	9.66667	3.38889	6.625	2.55319	22.2337
1903	9.08333	3.44444	6.33333	2.55319	21.4143
1904	9.05556	3.30556	7.13889	2.55319	22.0532
1905	9.88889	3.13889	7.80556	2.55319	23.3865
1906	10.6667	3.58333	8.13889	2.55319	24.9421
1907	11.1389	3.58333	7.41667	2.55319	24.6921
1908	10.9444	3.80556	8.41667	2.55319	25.7199
1909	10.9722	3.47222	10.6667	2.55319	27.6643
1910	11.1111	3.91667	13.1667	2.55319	30.7476
1911	11.4167	4.13889	13.6667	2.55319	31.7754
1912	11.5417	4.41667	13.5	2.55319	32.0115
1913	11.9167	4.5	12.5	2.55319	31.4699
Composition of coal prices at the port of Montevideo (shillings per ton, three-year moving averages).
Sources: see caption to Figure 3 in Travieso, E. "United by coal, separated by grass: Uruguay and New Zealand during the First Globalization", Journal of Global History 15(2), 2020.

## Sheet: Frozen meat exports (Fig.4)
Year	New Zealand	Uruguay
1882	3.42342	0
1883	14.5977	0
1884	34.4253	0
1885	53.6274	0
1886	68.4738	0
1887	73.8535	0
1888	79.0353	0
1889	80.7216	0
1890	84.5276	0
1891	85.8383	0
1892	86.8496	0
1893	86.3364	0
1894	85.6912	0
1895	84.5975	0
1896	84.6623	0
1897	84.7767	0
1898	85.4545	0
1899	85.8914	0
1900	85.7152	0
1901	86.2419	0
1902	84.9652	0
1903	85.2398	0
1904	85.958	0
1905	87.7529	1.60333
1906	87.8489	2.71
1907	86.9388	6.15667
1908	86.3833	8.81667
1909	85.8516	11.0067
1910	85.0717	12.21
1911	84.5175	11.81
1912	84.6319	19.4967
1913	85.7856	36.0167
Frozen meat as a share of the total value of exported meat, 1882–1913 (in percentages, three-year moving averages).
Sources: see caption to Figure 4 in Travieso, E. "United by coal, separated by grass: Uruguay and New Zealand during the First Globalization", Journal of Global History 15(2), 2020.
